# Supplementary material for: Development of Hollow Fiber Membranes Functionalized with Ionic Liquids for Enhanced CO2 Separation
Source: PubMed Central journal article supplement (PMC11323277; doi:10.1021/acssuschemeng.4c04597), 2024-07-31
Supplement: sc4c04597_si_001.pdf [file sc4c04597_si_001.pdf]

# Supporting Information

## Development of Hollow-Fiber Membranes Functionalized with Ionic Liquids for Enhanced CO<sub>2</sub> Separation

*Julia A. Piotrowska<sup>†</sup>, Christian Jordan<sup>‡</sup>, Michael Harasek<sup>\*,‡</sup> and Katharina Schröder<sup>\*,†</sup>*

<sup>†</sup>Technische Universität Wien, Institute of Applied Synthetic Chemistry, Getreidemarkt 9/163, 1060 Vienna, Austria

<sup>‡</sup>Technische Universität Wien, Institute of Chemical, Environmental and Bioscience Engineering, Getreidemarkt 9/E166, 1060 Vienna, Austria

### Corresponding Authors

\* Katharina Schröder, phone: +43 1 58801 163601, mail: [katharina.schroeder@tuwien.ac.at](mailto:katharina.schroeder@tuwien.ac.at)

\* Michael Harasek, phone: +43 1 58801 - 166 202, mail: [michael.harasek@tuwien.ac.at](mailto:michael.harasek@tuwien.ac.at)

Number of pages: 7

Number of figures: 5

Number of tables: 2

## 1. Viscosity-density data, FT-IR and $^1\text{H}$ NMR of the pure ionic liquids

Table S1 Viscosity and density data of purchased ionic liquids, provided by the company

| IL type                          | $[\text{C}_6\text{mim}][\text{NTf}_2]$ | $[\text{C}_6\text{mim}][\text{Cl}]$ |
|----------------------------------|----------------------------------------|-------------------------------------|
| Viscosity [cP]                   | 63.2                                   | 3302                                |
| Density $[\text{g}/\text{cm}^3]$ | 1.37                                   | 1.04                                |

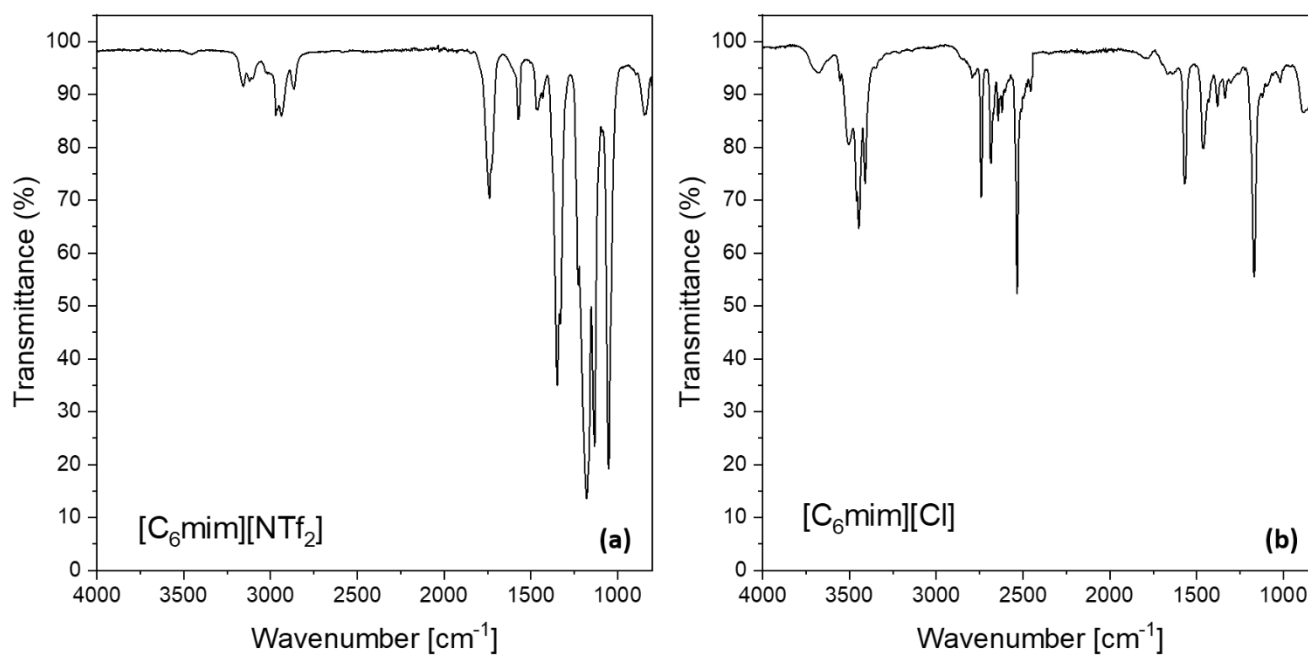

Figure S1. FT-IR spectra of pure  $[\text{C}_6\text{mim}][\text{NTf}_2]$  (a) and  $[\text{C}_6\text{mim}][\text{Cl}]$  (b)



## 2. SEM images of flat sheet membranes coated with $[C_6mim][Cl]$

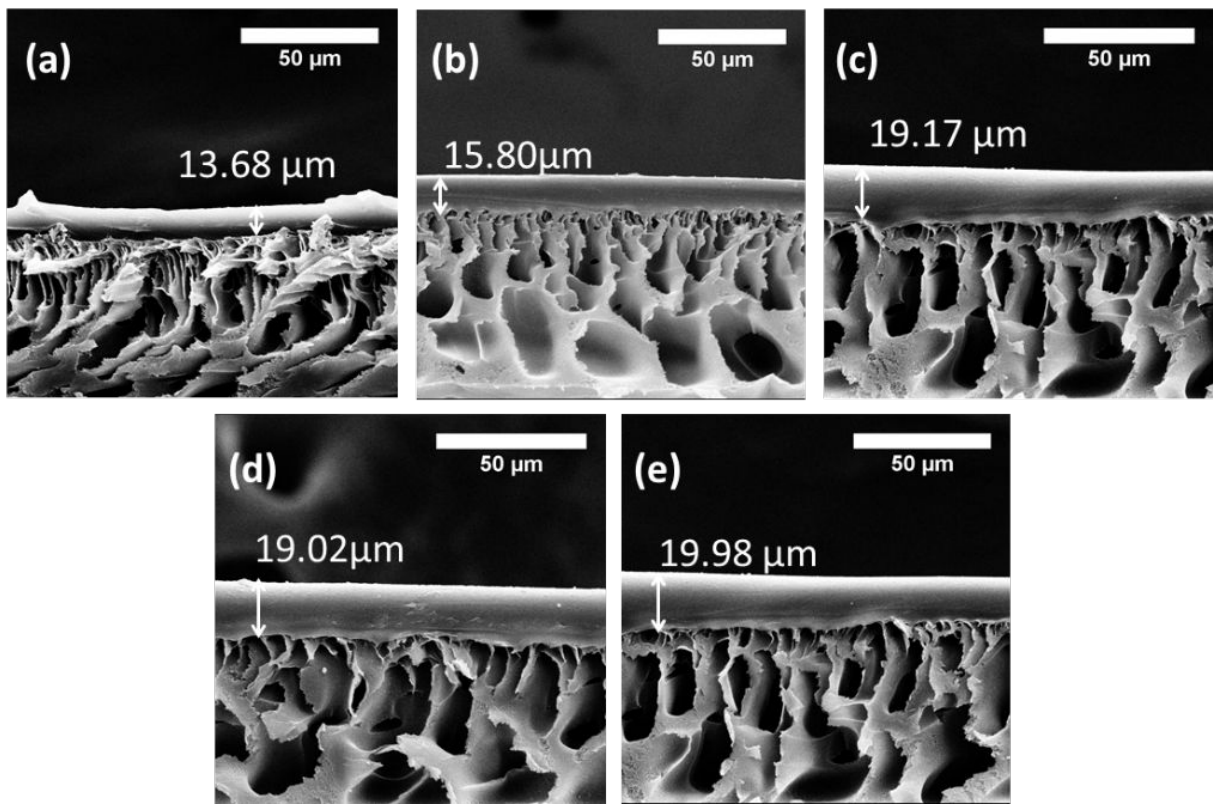

Figure S3. SEM images of flat sheet membranes coated with 10 (a), 20 (b), 40 (c), 60 (d) and 80 wt.% of  $[C_6mim][Cl]$  (e)

### 3. TGA and DSC curves

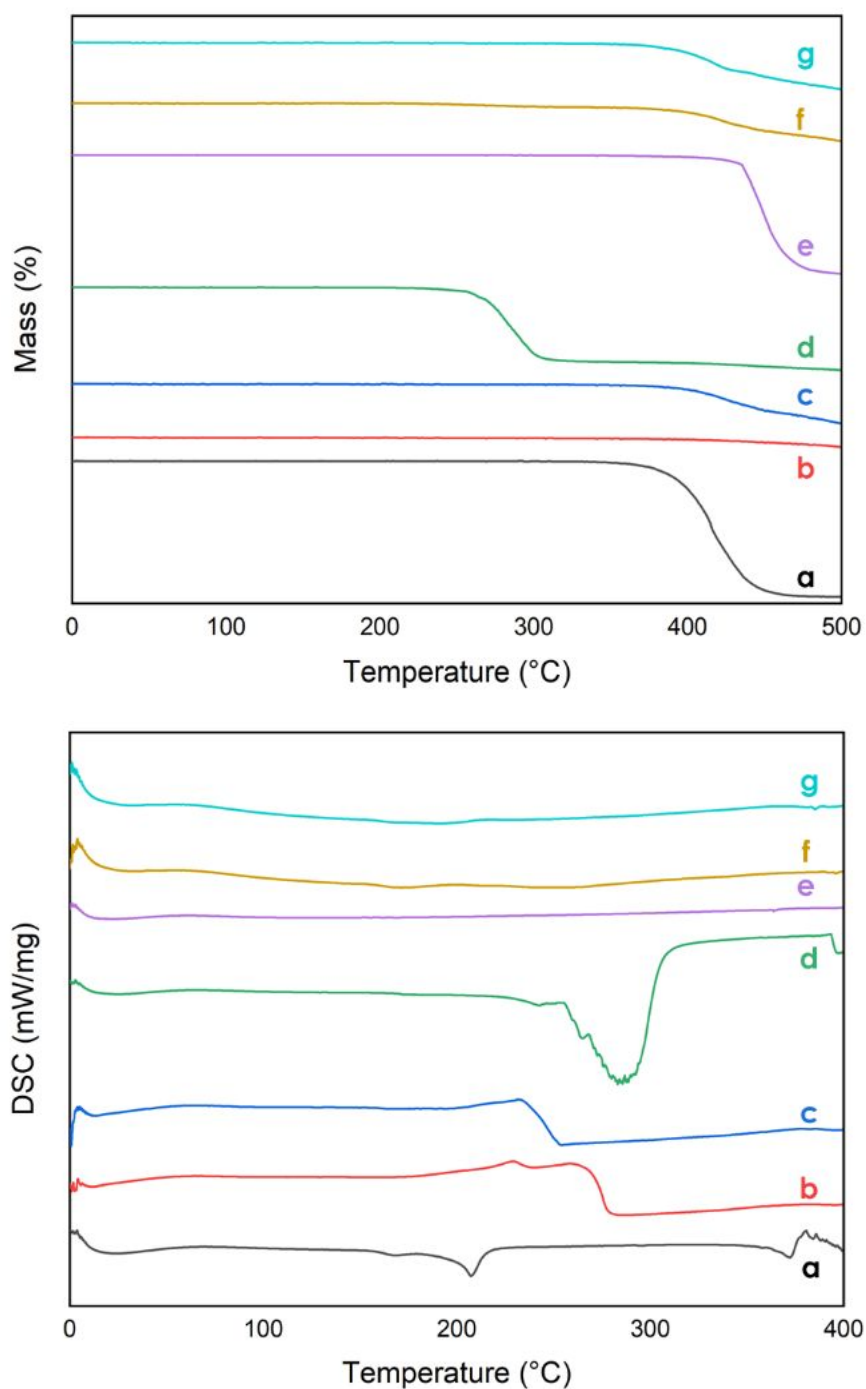

Figure S4. TGA (upper) and DSC (lower) curves of: pure Pebax 1657 (a), PES uncoated membrane (b), membranes coated with: neat Pebax (c), neat  $[C_6mim]Cl$  (d), neat  $[C_6mim][NTf_2]$  (e), Pebax and 20 wt.% of  $[C_6mim][NTf_2]$  (f), Pebax and 20 wt.% of  $[C_6mim][Cl]$  (g)

## 4. XRD spectra of coated membranes

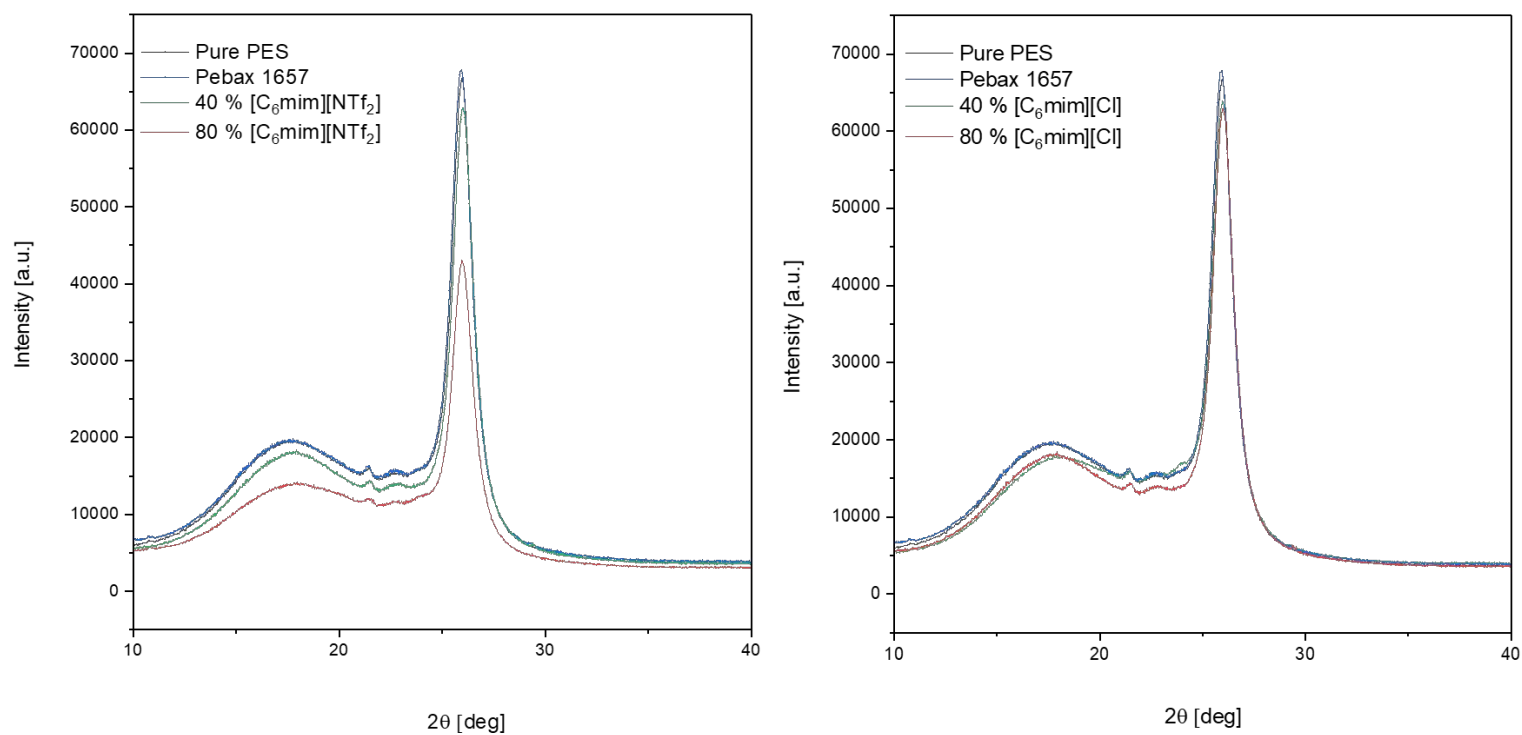

Figure S5. XRD spectra of dense neat Pebax 1657, Pebax1657/IL 40 wt.% and Pebax1657/IL 80 wt.%, for [C<sub>6</sub>mim][NTf<sub>2</sub>] (a) and [C<sub>6</sub>mim][Cl] (b)

## 5. Comparison of CO<sub>2</sub>/N<sub>2</sub>- and CO<sub>2</sub>/CO-separation properties of membranes with the literature data

Table S2 Literature comparison - performance of membranes coated with Pebax 1657 and / or ILs

|    | Membrane type                  | Coating Material                                           | CO <sub>2</sub> permeability | Ideal selectivity [-]           |                     |                   | Test conditions          | Ref.       |
|----|--------------------------------|------------------------------------------------------------|------------------------------|---------------------------------|---------------------|-------------------|--------------------------|------------|
|    |                                |                                                            |                              | CO <sub>2</sub> /N <sub>2</sub> | CO <sub>2</sub> /CO | CO/N <sub>2</sub> |                          |            |
| 1. | Supported Flat sheet composite | Pebax 1657/<br>40% [C <sub>6</sub> mim][NTf <sub>2</sub> ] | 163 Barrer                   | 44                              | -                   | -                 | 25 °C, variable pressure | This paper |
| 2. | Neat polymer flat sheet        | Pebax 1657                                                 | 80 Barrer                    | 70                              | -                   | -                 | 21 °C, variable pressure | 1          |
| 3. | Neat polymer flat sheet        | Pebax 1657                                                 | 20 GPU                       | 28                              | 50                  | 0.5               | 25 °C, variable pressure | 2          |
| 4. | Hollow fibers                  | Pebax 1657                                                 | 7.6 GPU<br>(69 Barrer)       | 18                              | 13                  | 1.1               | 25 °C, 2 bar             | This paper |
| 5. | Hollow fibers                  | Pebax 1657/<br>40% [C <sub>6</sub> mim][NTf <sub>2</sub> ] | 23 GPU<br>(245 Barrer)       | 8.7                             | 12.3                | 0.7               | 25 °C, 2 bar             | This paper |
| 6. | Hollow fibers                  | Pebax 1657                                                 | 86.4 Barrer                  | 34                              | -                   | -                 | 25 °C, 1 bar             | 3          |
| 7. | Hollow fibers                  | Pebax 1657/<br>40% [emim][BF <sub>4</sub> ]                | 143 Barrer                   | 34                              | -                   | -                 | 35 °C, 3 bar             | 3          |
| 8. | Hollow fibers                  | [emim][NTf <sub>2</sub> ]                                  | 2600–3100 Barrer             | 33                              | -                   | -                 | 25 °C, 1 bar             | 4          |
| 9. | Hollow fibers                  | Pebax 1657/<br>[emim][BF <sub>4</sub> ]/GO                 | 642 GPU                      | 34                              | -                   | -                 | 35 °C, 3 bar             | 5          |

- (1) Yu, B.; Cong, H.; Li, Z.; Tang, J.; Zhao, X. S. Pebax-1657 Nanocomposite Membranes Incorporated with Nanoparticles/ Colloids/Carbon Nanotubes for CO<sub>2</sub>/N<sub>2</sub> and CO<sub>2</sub>/H<sub>2</sub> Separation. *J. Appl. Polym. Sci.* **2013**, *130* (4), 2867–2876. <https://doi.org/10.1002/app.39500>.
- (2) Park, C. H.; Lee, J. H.; Kim, N. U.; Kong, C. I.; Kim, J. H.; Kim, J. H. Solid-State Facilitated Transport of Carbon Monoxide through Mixed Matrix Membranes. *J. Memb. Sci.* **2019**, *592* (June), 117373. <https://doi.org/10.1016/j.memsci.2019.117373>.
- (3) Fam, W.; Mansouri, J.; Li, H.; Chen, V. Improving CO<sub>2</sub> Separation Performance of Thin Film Composite Hollow Fiber with Pebax®1657/Ionic Liquid Gel Membranes. *J. Memb. Sci.* **2017**, *537* (May), 54–68. <https://doi.org/10.1016/j.memsci.2017.05.011>.
- (4) Kim, D. H.; Baek, I. H.; Hong, S. U.; Lee, H. K. Study on Immobilized Liquid Membrane Using Ionic Liquid and PVDF Hollow Fiber as a Support for CO<sub>2</sub>/N<sub>2</sub> Separation. *J. Memb. Sci.* **2011**, *372* (1–2), 346–354. <https://doi.org/10.1016/j.memsci.2011.02.025>.
- (5) Fam, W.; Mansouri, J.; Li, H.; Hou, J.; Chen, V. Gelled Graphene Oxide-Ionic Liquid Composite Membranes with Enriched Ionic Liquid Surfaces for Improved CO<sub>2</sub> Separation. *ACS Appl. Mater. Interfaces* **2018**, *10* (8), 7389–7400. <https://doi.org/10.1021/acsami.7b18988>.
